# Supplementary material
Source: Springer Nature journal article supplement (https://www.springermedizin.de/resource/supplementary/13034_2009_96_MOESM2_ESM.pdf/9652318)

LS Mean Change Improvement

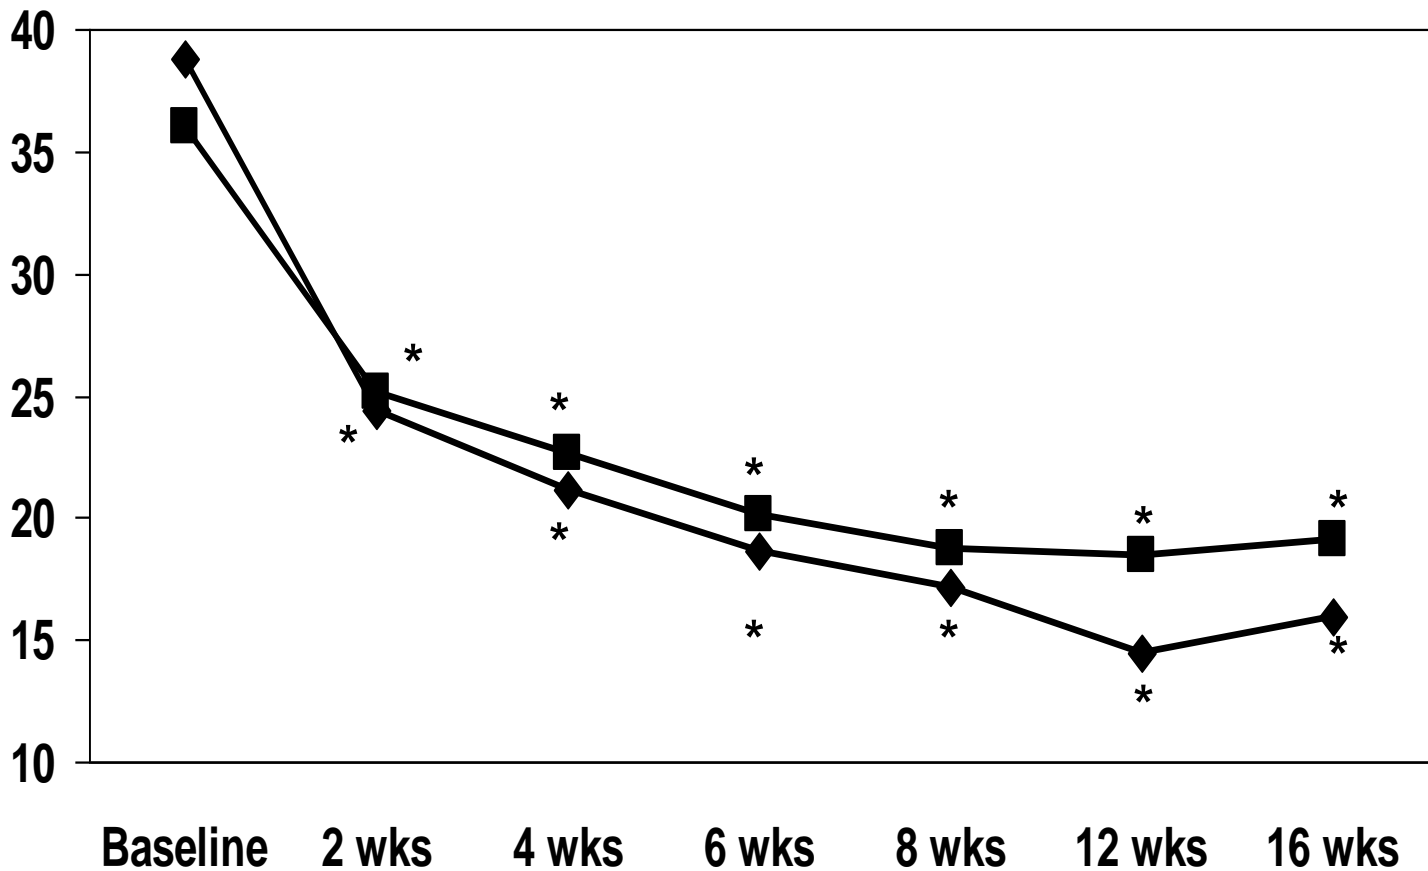

◆ ADHD ■ ADHD+D

Supplement: MOESM2 [file 9652318]
